# Supplementary material
Source: publisher site journal article supplement (https://www.dovepress.com/article/141815)
Supplement: Supplementary file 1 [file get_supplementary_file.php%3Ff%3D141815.pdf]

Supplementary materials

Figure S1

## Colorectal Cancer Patient Self Completion

This form should be filled out by the patient

| Country | Dr    | Pt    | Card  |
|---------|-------|-------|-------|
| (1-2)   | (3-5) | (6-7) | (8-9) |
| 2 8     |       |       | 16    |

AGENCY  
DOCTOR NO. \_\_\_\_\_

Date:        
Day Month Year

### SECTION A: SOME PERSONAL DETAILS

1. What is your age? \_\_\_\_\_ years
2. What is your gender?  Male  Female
3. What is your ethnic origin?  
 White / Caucasian  Afro-Caribbean  
 Middle eastern  Asian - Indian subcontinent  
 Asian - Other  Other (please specify) \_\_\_\_\_
4. What is your current employment status?  
 Full time  Part time  
 Unemployed  Retired  
 Self employed  Homemaker  
 Medically disabled / unable to work  Other (please specify) \_\_\_\_\_
5. What is the highest level of education that you have achieved?  
 Secondary (Standard grade)  Sixth form / College  
 University  Postgraduate  
 Other (please specify) \_\_\_\_\_

Please turn to page 2...

**SECTION B: YOUR LIFE SATISFACTION**

**1. How satisfied are you with your life overall?**

To help people say how satisfied or dissatisfied they are, we have drawn a scale (rather like a thermometer) on which “completely satisfied” is marked 100 and “so dissatisfied you may as well be dead” is marked 0

We would like you to indicate on this scale how satisfied or dissatisfied with your life you are. Please do this by drawing a line from the box to whichever point on the scale indicates how satisfied you are overall.

**Your level of satisfaction with life**

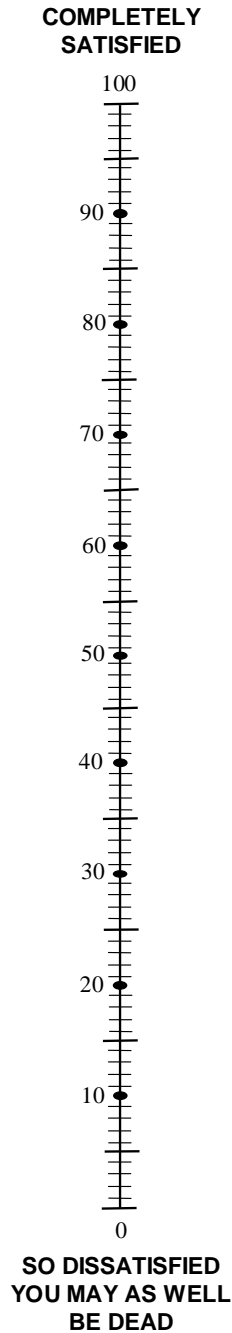

**SECTION B: YOUR LIFE SATISFACTION CONTINUED...**

**2. Overall how did you feel yesterday?** *(Please circle the appropriate number on each row)*

|              | Not at all... |   |   |   |   |   | Very much... |
|--------------|---------------|---|---|---|---|---|--------------|
| ...Hopeful   | 0             | 1 | 2 | 3 | 4 | 5 | 6            |
| ...Sad       | 0             | 1 | 2 | 3 | 4 | 5 | 6            |
| ...Fearful   | 0             | 1 | 2 | 3 | 4 | 5 | 6            |
| ...Tired     | 0             | 1 | 2 | 3 | 4 | 5 | 6            |
| ...Happy     | 0             | 1 | 2 | 3 | 4 | 5 | 6            |
| ...Worried   | 0             | 1 | 2 | 3 | 4 | 5 | 6            |
| ...Satisfied | 0             | 1 | 2 | 3 | 4 | 5 | 6            |

**Did you think about your family or health at all yesterday?**

- 3a. I thought about my family:** Not at all  > *If not at all then please go to question 4a*  
*(Please ✓ one)* A few times   
 Many times   
 Continually

**3b. When I thought about my family it generally made me feel:**

*(Please circle the appropriate number on each row)*

|            | Not at all... |   |   |   |   |   | Very much... |
|------------|---------------|---|---|---|---|---|--------------|
| ...Happy   | 0             | 1 | 2 | 3 | 4 | 5 | 6            |
| ...Worried | 0             | 1 | 2 | 3 | 4 | 5 | 6            |



**SECTION C: LIFE QUALITY CHOICE**

Imagine that you will live for another 10 years with your current health problems, after which you will die.

Imagine instead that your health problems could be removed but that you would live for fewer years. **For each row in the table that follows**, please indicate whether you would choose 10 years with your current health problems or fewer years without any health problems.

| Life A                                            | Circle A or B |   | Life B                                       |
|---------------------------------------------------|---------------|---|----------------------------------------------|
| 10 years <b>with</b> your current health problems | A             | B | 10 years <b>without</b> any health problems  |
| 10 years <b>with</b> your current health problems | A             | B | 9.5 years <b>without</b> any health problems |
| 10 years <b>with</b> your current health problems | A             | B | 9 years <b>without</b> any health problems   |
| 10 years <b>with</b> your current health problems | A             | B | 8.5 years <b>without</b> any health problems |
| 10 years <b>with</b> your current health problems | A             | B | 8 years <b>without</b> any health problems   |
| 10 years <b>with</b> your current health problems | A             | B | 7.5 years <b>without</b> any health problems |
| 10 years <b>with</b> your current health problems | A             | B | 7 years <b>without</b> any health problems   |
| 10 years <b>with</b> your current health problems | A             | B | 6.5 years <b>without</b> any health problems |
| 10 years <b>with</b> your current health problems | A             | B | 6 years <b>without</b> any health problems   |
| 10 years <b>with</b> your current health problems | A             | B | 5.5 years <b>without</b> any health problems |
| 10 years <b>with</b> your current health problems | A             | B | 5 years <b>without</b> any health problems   |
| 10 years <b>with</b> your current health problems | A             | B | 4.5 years <b>without</b> any health problems |
| 10 years <b>with</b> your current health problems | A             | B | 4 years <b>without</b> any health problems   |
| 10 years <b>with</b> your current health problems | A             | B | 3.5 years <b>without</b> any health problems |
| 10 years <b>with</b> your current health problems | A             | B | 3 years <b>without</b> any health problems   |
| 10 years <b>with</b> your current health problems | A             | B | 2.5 years <b>without</b> any health problems |
| 10 years <b>with</b> your current health problems | A             | B | 2 years <b>without</b> any health problems   |
| 10 years <b>with</b> your current health problems | A             | B | 1.5 years <b>without</b> any health problems |
| 10 years <b>with</b> your current health problems | A             | B | 1 years <b>without</b> any health problems   |
| 10 years <b>with</b> your current health problems | A             | B | 0.5 years <b>without</b> any health problems |
| 10 years <b>with</b> your current health problems | A             | B | 0 years <b>without</b> any health problems   |

SECTION D: EQ5D

By placing a ✓ in one box in each group below, please indicate which statements best describe your own health today

**1 MOBILITY (✓ 1 statement only)**

- I have no problems in walking about
- I have some problems in walking about
- I am confined to bed

**2 SELF-CARE (✓ 1 statement only)**

- I have no problems with self-care
- I have some problems washing or dressing myself
- I am unable to wash or dress myself

**3 USUAL ACTIVITIES (✓ 1 statement only)**  
(e.g. work, study, housework, family or leisure activities)

- I have no problems with performing my usual activities
- I have some problems with performing my usual activities
- I am unable to perform my usual activities

**4 PAIN / DISCOMFORT (✓ 1 statement only)**

- I have no pain or discomfort
- I have moderate pain or discomfort
- I have extreme pain or discomfort

**5 ANXIETY / DEPRESSION (✓ 1 statement only)**

- I am not anxious or depressed
- I am moderately anxious or depressed
- I am extremely anxious or depressed

**Figure S2**

|                    |                                                                                      |
|--------------------|--------------------------------------------------------------------------------------|
| Disease Stage      | 1 if stage IV, 0 otherwise                                                           |
| Remission Status   | 1 if in remission, 0 otherwise                                                       |
| Performance Status | 1 if fully active, 0 otherwise                                                       |
| Date of Diagnosis  | 1 if 2010, 0 if pre-2010                                                             |
| Age                | 1 if 60 years old or older, 0 otherwise                                              |
| Gender             | 1 if female, 0 if male                                                               |
| Education          | 1 if completed university or higher, 0 if completed less than a university education |
| Employment         | 1 if full-time, part-time or self-employed, 0 if unemployed, N/A otherwise           |
| <u>EQ5D Coding</u> |                                                                                      |
| MO                 | 1 if mobility is level 2; 0 otherwise                                                |
| M2                 | 1 if mobility is level 3; 0 otherwise                                                |
| SC                 | 1 if self-care is level 2; 0 otherwise                                               |
| S2                 | 1 if self-care is level 3; 0 otherwise                                               |
| UA                 | 1 if usual activities is level 2; 0 otherwise                                        |
| U2                 | 1 if usual activities is level 3; 0 otherwise                                        |
| PD                 | 1 if pain/discomfort is level 2; 0 otherwise                                         |
| P2                 | 1 if pain/discomfort is level 3; 0 otherwise                                         |
| AD                 | 1 if anxiety/depression is level 2; 0 otherwise                                      |
| A2                 | 1 if anxiety/depression is level 3; 0 otherwise                                      |
| N3                 | 1 if any dimension is level 3; 0 otherwise                                           |

### Intrusive Thoughts

Thoughts around health/family 0 if frequency is many times and 'happy' rated greater than or equal to 'worried'  
1 if frequency is a few times and 'happy' rated greater than or equal to 'worried'  
2 if frequency is a few times and 'worried' rated greater than 'happy'  
3 if frequency is many times and 'worried' rated greater than 'happy'

Life Satisfaction Scores ranged from 0 (rather be dead) to 100 (completely satisfied)

Day Affect Scores ranged from -6 to 6
